# Supplementary material for: The role of CT excitations in PDI aggregates
Source: Royal Society of Chemistry journal article supplement (doi:10.1039/d0cp02344b), 2020-01-01
Supplement: d0cp02344b1.pdf [file d0cp02344b1.pdf]

# Supporting Information for:

## The role of CT excitations in PDI aggregates

Maria Zubiria-Ulacia,<sup>†</sup> Jon Mattin Matxain,<sup>‡,†</sup> and David Casanova<sup>\*,†,¶</sup>

<sup>†</sup>*Donostia International Physics Center, Manuel Lardizabal 4, 20018 Donostia-San  
Sebastian, Euskadi, Spain*

<sup>‡</sup>*Universidad del País Vasco/Euskal Herriko Unibertsitatea, Manuel Lardizabal 3, 20018  
Donostia-San Sebastian, Spain*

<sup>¶</sup>*Ikerbasque, Basque Foundation for Science, 48011 Bilbao, Spain*

E-mail: david.casanova@ehu.eus

## Contents

|   |                                                   |    |
|---|---------------------------------------------------|----|
| 1 | PDI molecule                                      | 2  |
| 2 | <i>Intra-</i> and <i>inter</i> -column PDI dimers | 6  |
| 3 | PDI pentamer                                      | 8  |
| 4 | Diabatic states of PDI dimers                     | 9  |
| 5 | Triplet excitons along intermolecular distortions | 10 |
| 6 | Optimized geometries                              | 15 |

# 1 PDI molecule

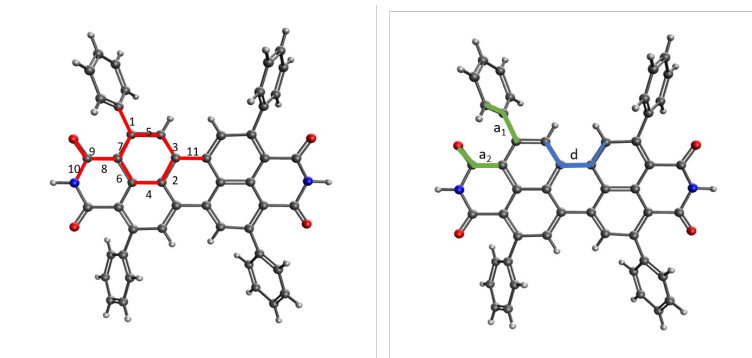

Figure S1: Analysed bond distances, angles and dihedrals in the optimized and crystal structures.

Table S1: Optimized and crystal structure bond lengths ( $\text{\AA}$ ), angles ( $^\circ$ ) and dihedral ( $^\circ$ ) of the PDI molecule. See Figure S1 for labelling. Crystal bond lengths are given by the mean value of analogue bonds.

|                | Optimized | Crystal |
|----------------|-----------|---------|
| C...C (1)      | 1.49      | 1.50    |
| C...C (2)      | 1.42      | 1.42    |
| C...C (3)      | 1.38      | 1.38    |
| C...C (4)      | 1.42      | 1.41    |
| C...C (5)      | 1.41      | 1.43    |
| C...C (6)      | 1.43      | 1.42    |
| C...C (7)      | 1.39      | 1.38    |
| C...C (8)      | 1.49      | 1.51    |
| C...O (9)      | 1.21      | 1.21    |
| C...N(10)      | 1.38      | 1.40    |
| C...C(11)      | 1.48      | 1.48    |
| a <sub>1</sub> | 121.0     | 123.5   |
| a <sub>2</sub> | 125.4     | 119.7   |
| d <sub>1</sub> | 6.3       | 5.5     |

Table S2: MO energies (in eV) for PDI **2** and the optimized PDI **3** computed at CAM-B3LYP/6-31G(d) level.

|              | HOMO-1 | HOMO   | LUMO   | LUMO+1 |
|--------------|--------|--------|--------|--------|
| PDI <b>2</b> | -0.281 | -0.262 | -0.08  | -0.023 |
| PDI <b>3</b> | -0.329 | -0.266 | -0.093 | -0.026 |

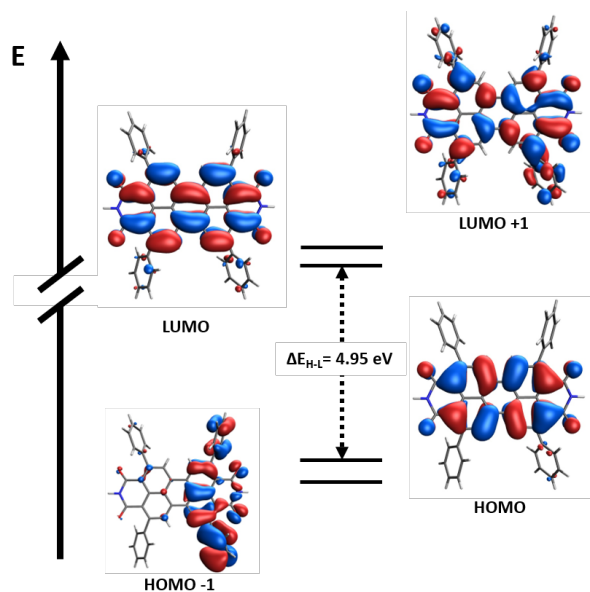

Figure S2: Frontier molecular orbitals of the PDI **2** derivative computed at CAM-B3LYP/6-31G(d).

Table S3: Vertical excitation energies (in eV) and oscillator strengths (in parenthesis) to the lowest singlet and triplet excited states computed at CAM-B3LYP/6-31G(d) level for the PDI **2**. Orbital-to-orbital composition correspond to TDA transitions. H=HOMO; L=LUMO.

| State          | TDDFT       | TDA         | Composition          |
|----------------|-------------|-------------|----------------------|
| S <sub>1</sub> | 3.01(0.720) | 3.19(0.986) | 95 % H→L             |
| S <sub>2</sub> | 3.42(0.047) | 3.47(0.057) | 75 % H-1→L           |
| S <sub>3</sub> | 3.58(0.234) | 3.61(0.232) | 72 % H-2→L           |
| S <sub>4</sub> | 3.88(0.010) | 3.91(0.015) | 57 % H-3→L           |
| S <sub>5</sub> | 3.94(0.006) | 3.97(0.010) | 41 % H-9→L           |
| T <sub>1</sub> | 1.46        | 1.93        | 88% H→L              |
| T <sub>2</sub> | 2.67        | 2.95        | 31% H-2→L, 24% H→L+1 |
| T <sub>3</sub> | 2.92        | 3.05        | 32% H-1→L, 10% H→L+1 |
| T <sub>4</sub> | 3.05        | 3.14        | 55% H-2→L            |
| T <sub>5</sub> | 3.11        | 3.34        | 40% H→L+3            |

Table S4: Vertical excitation energies (in eV) and oscillator strengths (in parenthesis) to the lowest singlet and triplet excited states computed at B3LYP/6-31G(d) level for the PDI **2**. Orbital-to-orbital composition correspond to TDA transitions. H=HOMO; L=LUMO.

| State          | TDDFT       | TDA         | Composition |
|----------------|-------------|-------------|-------------|
| S <sub>1</sub> | 2.60(0.275) | 2.63(0.440) | 93% H-1→L   |
| S <sub>2</sub> | 2.63(0.314) | 2.72(0.083) | 94% H-2→L   |
| S <sub>3</sub> | 2.71(0.079) | 2.79(0.733) | 90% H→L     |
| S <sub>4</sub> | 2.92(0.032) | 2.93(0.088) | 90% H-3→L   |
| S <sub>5</sub> | 3.02(0.041) | 3.02(0.075) | 92% H→4-L   |
| T <sub>1</sub> | 1.57        | 1.75        | 95% H→L     |
| T <sub>2</sub> | 2.40        | 2.42        | 92% H→1-L   |
| T <sub>3</sub> | 2.51        | 2.53        | 91% H→2-L   |
| T <sub>4</sub> | 2.63        | 2.69        | 67% H→3-L   |
| T <sub>5</sub> | 2.86        | 2.88        | 60% H→4-L   |

Table S5: Vertical excitation energies (in eV) and oscillator strengths (in parenthesis) to the lowest singlet and triplet excited states computed at  $\omega$ B97X/6-31G(d) level for the PDI **2**. Orbital-to-orbital composition correspond to TDA transitions. H=HOMO; L=LUMO.

| State          | TDDFT       | TDA         | Composition |
|----------------|-------------|-------------|-------------|
| S <sub>1</sub> | 3.21(0.785) | 3.40(1.035) | 92% H→L     |
| S <sub>2</sub> | 3.74(0.042) | 3.82(0.050) | 57% H→1-L   |
| S <sub>3</sub> | 3.90(0.289) | 3.97(0.296) | 54% H→2-L   |
| S <sub>4</sub> | 4.20(0.003) | 4.23(0.005) | 39% H→9-L   |
| S <sub>5</sub> | 4.26(0.011) | 4.31(0.028) | 45% H→10-L  |
| T <sub>1</sub> | 1.42        | 2.06        | 83% H→L     |
| T <sub>2</sub> | 2.68        | 3.08        | 33% H→L+2   |
| T <sub>3</sub> | 3.06        | 3.26        | 43% H→1-L   |
| T <sub>4</sub> | 3.17        | 3.35        | 37% H→2-L   |
| T <sub>5</sub> | 3.23        | 3.46        | 30% H→L+4   |

Table S6: Vertical excitation energies (in eV) and oscillator strengths (in parenthesis) to the lowest singlet and triplet excited states computed at CAM-B3LYP/6-311+G(d) level for the PDI **2**. Orbital-to-orbital composition correspond to TDA transitions. H=HOMO; L=LUMO.

| State          | TDDFT       | TDA         | Composition         |
|----------------|-------------|-------------|---------------------|
| S <sub>1</sub> | 2.94(0.699) | 3.11(0.945) | 94 % H→L            |
| S <sub>2</sub> | 3.37(0.043) | 3.42(0.054) | 75 % H-1→L          |
| S <sub>3</sub> | 3.54(0.279) | 3.57(0.285) | 72 % H-2→L          |
| S <sub>4</sub> | 3.85(0.012) | 3.88(0.016) | 69 % H-3→L          |
| S <sub>5</sub> | 3.94(0.004) | 3.96(0.006) | 44 % H-9→L          |
| T <sub>1</sub> | 1.47        | 1.92        | 88% H→L             |
| T <sub>2</sub> | 2.66        | 2.92        | 41% H-1→L,18% H→L+1 |
| T <sub>3</sub> | 2.88        | 3.01        | 21% H-1→L,16% H→L+1 |
| T <sub>4</sub> | 3.00        | 3.09        | 53% H-2→L           |
| T <sub>5</sub> | 3.08        | 3.30        | 75% H-1→L           |

## 2 *Intra-* and *inter-*column PDI dimers

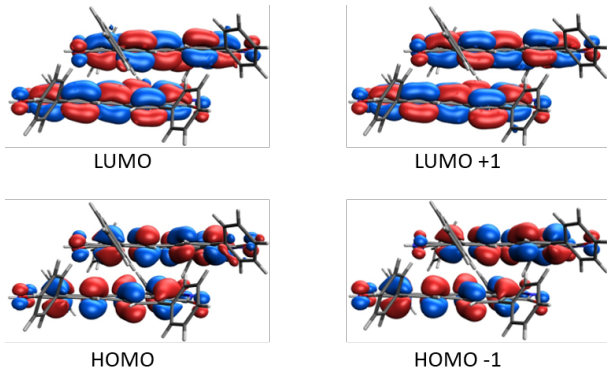

Figure S3: Molecular orbital diagram of **D2** computed at the TDA, CAM-B3LYP/6-31G(d) level.

Table S7 shows low-lying singlet and triplet excited state energies and oscillator strengths for the *intra* and *inter* column dimers of PDI from the crystal structure of **1**. Excited state distribution in the *inter*-dimer, near degeneracy between pairs of states, indicates weak coupling. Energy splitting between low-lying states is much larger for the *intra*-dimer.

Table S7: Excitation energies (in eV) and oscillator strengths ( $f$ ) to the lowest singlet and triplet excited states of *inter*-column and *intra*- (**D2**) dimers computed at the TDA, CAM-B3LYP/6-31G(d) level.

| state          | <i>inter</i> |       | <i>intra</i> |        |
|----------------|--------------|-------|--------------|--------|
|                | $\Delta E$   | $f$   | $\Delta E$   | $f$    |
| S <sub>1</sub> | 3.17         | 2.042 | 3.04         | 0.0000 |
| S <sub>2</sub> | 3.19         | 0.021 | 3.12         | 1.1228 |
| S <sub>3</sub> | 3.38         | 0.116 | 3.29         | 0.0000 |
| S <sub>4</sub> | 3.47         | 0.056 | 3.38         | 0.5012 |
| S <sub>5</sub> | 3.60         | 0.421 | 3.42         | 0.0000 |
| S <sub>6</sub> | 3.61         | 0.035 | 3.43         | 0.2152 |
| T <sub>1</sub> | 1.93         | -     | 1.92         | -      |
| T <sub>2</sub> | 1.94         | -     | 1.94         | -      |
| T <sub>3</sub> | 2.89         | -     | 2.94         | -      |
| T <sub>4</sub> | 2.94         | -     | 2.94         | -      |
| T <sub>5</sub> | 3.04         | -     | 2.96         | -      |
| T <sub>6</sub> | 3.04         | -     | 2.97         | -      |

Table S8: Excitation energies (in eV) and oscillator strengths ( $f$ ) to the lowest singlet and triplet excited states of *inter*-column and *intra*- (**D2**) dimers computed at the TDA,  $\omega$ B97X-D/6-31G(d) level.

| state          | <i>inter</i> |       | <i>intra</i> |       |
|----------------|--------------|-------|--------------|-------|
|                | $\Delta E$   | $f$   | $\Delta E$   | $f$   |
| S <sub>1</sub> | 3.21         | 2.049 | 3.08         | 0.000 |
| S <sub>2</sub> | 3.23         | 0.017 | 3.19         | 1.442 |
| S <sub>3</sub> | 3.48         | 0.119 | 3.47         | 0.000 |
| S <sub>4</sub> | 3.55         | 0.057 | 3.49         | 0.218 |
| S <sub>5</sub> | 3.68         | 0.487 | 3.53         | 0.000 |
| S <sub>6</sub> | 3.69         | 0.002 | 3.57         | 0.188 |
| T <sub>1</sub> | 1.99         | -     | 1.98         | -     |
| T <sub>2</sub> | 1.99         | -     | 1.99         | -     |
| T <sub>3</sub> | 2.96         | -     | 2.99         | -     |
| T <sub>4</sub> | 3.00         | -     | 3.00         | -     |
| T <sub>5</sub> | 3.09         | -     | 3.03         | -     |
| T <sub>6</sub> | 3.10         | -     | 3.04         | -     |

### 3 PDI pentamer

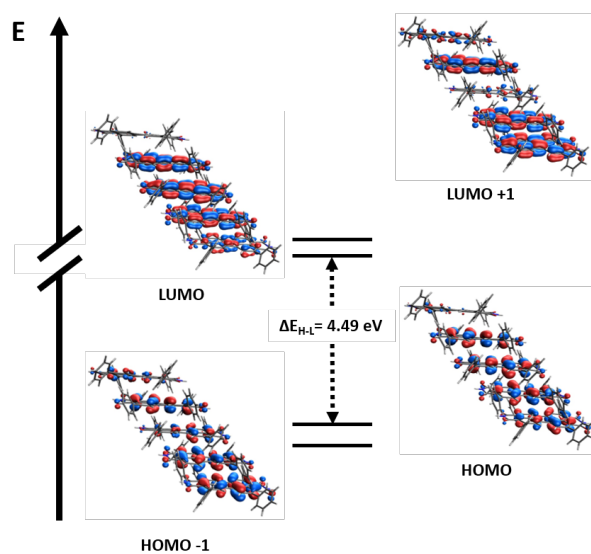

Figure S4: Frontier molecular orbitals of the PDI pentamer aggregate computed at CAM-B3LYP/6-31G(d).



## 4 Diabatic states of PDI dimers

Table S9: Transition energies (in eV), oscillator strengths (in parenthesis), and diabatic contributions  $\omega$  (in %) obtained through the ER diabatization for four excited singlet and triplet states of **D1** and **D2** dimers computed at the (TDA) CAM-B3LYP/6-31G(d) level. Diabatic states correspond to the ones mainly obtained as H,H-1 $\rightarrow$ L,L+1 electronic promotions.  $LE_A = A^*B$ ,  $LE_B = AB^*$ ,  $CT_{AB} = A^+B^-$ ,  $CT_{BA} = A^-B^+$ .

| state             | $\Delta E$ (f) | $\omega(LE_A)$ | $\omega(LE_B)$ | $\omega(CT_{AB})$ | $\omega(CT_{BA})$ |
|-------------------|----------------|----------------|----------------|-------------------|-------------------|
| <b>D1 dimer</b>   |                |                |                |                   |                   |
| S <sub>1,+</sub>  | 2.96 (1.009)   | 25             | 25             | 25                | 25                |
| S <sub>2,-</sub>  | 3.04 (0.000)   | 48             | 48             | 2                 | 2                 |
| S <sub>3,-</sub>  | 3.27 (0.000)   | 2              | 2              | 48                | 48                |
| S <sub>8,+</sub>  | 3.58 (0.645)   | 25             | 25             | 25                | 25                |
| T <sub>1,+</sub>  | 1.87           | 47             | 47             | 3                 | 3                 |
| T <sub>2,-</sub>  | 1.95           | 50             | 50             | 0                 | 0                 |
| T <sub>9,-</sub>  | 3.26           | 0              | 0              | 50                | 50                |
| T <sub>11,+</sub> | 3.33           | 3              | 3              | 47                | 47                |
| <b>D2 dimer</b>   |                |                |                |                   |                   |
| S <sub>1,-</sub>  | 3.04 (0.000)   | 48             | 48             | 2                 | 2                 |
| S <sub>2,+</sub>  | 3.12 (1.123)   | 26             | 26             | 24                | 24                |
| S <sub>3,-</sub>  | 3.29 (0.000)   | 2              | 2              | 48                | 48                |
| S <sub>4,+</sub>  | 3.38 (0.502)   | 24             | 24             | 26                | 26                |
| T <sub>1,-</sub>  | 1.92           | 49             | 49             | 1                 | 1                 |
| T <sub>2,+</sub>  | 1.94           | 50             | 50             | 0                 | 0                 |
| T <sub>9,-</sub>  | 3.29           | 0              | 0              | 50                | 50                |
| T <sub>12,+</sub> | 3.35           | 1              | 1              | 49                | 49                |

Table S10: Diabatic electronic energies (in eV) and electronic couplings obtained through the Boys diabatization of the four lowest excited singlets and triplet states of the PDI *intra*-dimers **D1** (unit cell) computed at the (TDA) CAM-B3LYP/6-31G(d) level.

| dimer     | $E(^1LE)$ | $E(^1CT)$ | $V_{DC}$ | $V_e$ | $V_h$ | $V_{CT}$ |
|-----------|-----------|-----------|----------|-------|-------|----------|
| <b>D1</b> | 3.16      | 3.27      | 105      | -176  | -134  | -3       |
| dimer     | $E(^3LE)$ | $E(^3CT)$ | $V_{DC}$ | $V_e$ | $V_h$ | $V_{CT}$ |
| <b>D1</b> | 1.95      | 3.25      | 0        | -183  | -145  | -3       |

Table S11: Transition energies (in eV), oscillator strengths (in parenthesis), and diabatic contributions  $\omega$  (in %) obtained through the Boys diabaticization for four excited singlet and triplet states of **D1** dimer computed at the (TDA) CAM-B3LYP/6-31G(d) level. Diabatic states correspond to the ones mainly obtained as H,H-1 $\rightarrow$ L,L+1 electronic promotions.  $LE_A = A^*B$ ,  $LE_B = AB^*$ ,  $CT_{AB} = A^+B^-$ ,  $CT_{BA} = A^-B^+$ .

| state             | $\Delta E$ ( $f$ ) | $\omega(LE_A)$ | $\omega(LE_B)$ | $\omega(CT_{AB})$ | $\omega(CT_{BA})$ |
|-------------------|--------------------|----------------|----------------|-------------------|-------------------|
| S <sub>1,+</sub>  | 2.96 (1.009)       | 25             | 25             | 25                | 25                |
| S <sub>2,-</sub>  | 3.04 (0.000)       | 48             | 48             | 2                 | 2                 |
| S <sub>3,-</sub>  | 3.27 (0.000)       | 2              | 2              | 48                | 48                |
| S <sub>8,+</sub>  | 3.58 (0.645)       | 25             | 25             | 25                | 25                |
| T <sub>1,+</sub>  | 1.87               | 47             | 47             | 3                 | 3                 |
| T <sub>2,-</sub>  | 1.95               | 50             | 50             | 0                 | 0                 |
| T <sub>9,-</sub>  | 3.26               | 0              | 0              | 50                | 50                |
| T <sub>11,+</sub> | 3.33               | 3              | 3              | 47                | 47                |

## 5 Triplet excitons along intermolecular distortions

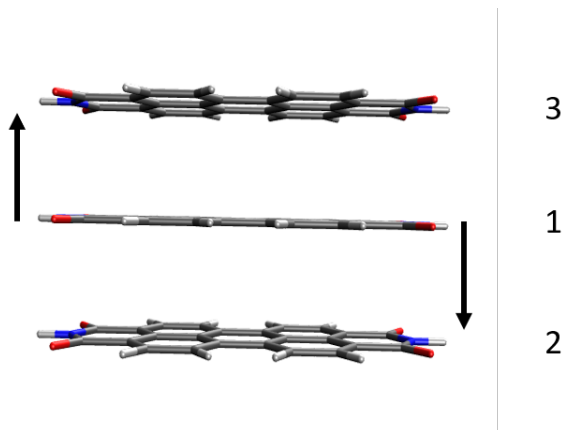

Figure S5: Molecular trimer of PDI **3**. Numbers indicate molecular labelling in Tables S12-S17.

Table S12: Diabatic electronic energies (in eV) and electronic couplings (in meV) obtained through the ER diabatization of the seven lowest excited triplet states of the eclipsed trimer along the vertical distortion (3.7 Å) computed at the (TDA) CAM-B3LYP/6-31G(d) level.  $LE_1 = 1^*23$ ,  $LE_2 = 12^*3$ ,  $LE_3 = 123^*$ ,  $CT_{12} = 1^+2^-3$ ,  $CT_{13} = 1^+23^-$ ,  $CT_{21} = 1^-2^+3$ ,  $CT_{31} = 1^-23^+$ .

| $H_{diab}$    | ${}^3LE_1$ | ${}^3LE_3$ | ${}^3LE_2$ | ${}^3CT_{31}$ | ${}^3CT_{21}$ | ${}^3CT_{12}$ | ${}^3CT_{13}$ |
|---------------|------------|------------|------------|---------------|---------------|---------------|---------------|
| ${}^3LE_1$    | 1.69       | 6          | 6          | -219          | 219           | 230           | -230          |
| ${}^3LE_3$    | 6          | 1.70       | -3         | 239           | 7             | 10            | 231           |
| ${}^3LE_2$    | 6          | -3         | 1.70       | -7            | -239          | -231          | -10           |
| ${}^3CT_{31}$ | -219       | 239        | -7         | 2.87          | 10            | 84            | -7            |
| ${}^3CT_{21}$ | 219        | 7          | -239       | 10            | 2.87          | -7            | 84            |
| ${}^3CT_{12}$ | 230        | 10         | -231       | 84            | -7            | 2.95          | 0             |
| ${}^3CT_{13}$ | -230       | 231        | -10        | -7            | 84            | 0             | 2.95          |

Table S13: Diabatic electronic energies (in eV) and electronic couplings (in meV) obtained through the ER diabatization of the seven lowest excited triplet states of the eclipsed trimer along the vertical distortion (4.0 Å) computed at the (TDA) CAM-B3LYP/6-31G(d) level.  $LE_1 = 1^*23$ ,  $LE_2 = 12^*3$ ,  $LE_3 = 123^*$ ,  $CT_{12} = 1^+2^-3$ ,  $CT_{13} = 1^+23^-$ ,  $CT_{21} = 1^-2^+3$ ,  $CT_{31} = 1^-23^+$ .

| $H_{diab}$    | ${}^3LE_1$ | ${}^3LE_3$ | ${}^3LE_2$ | ${}^3CT_{31}$ | ${}^3CT_{21}$ | ${}^3CT_{12}$ | ${}^3CT_{13}$ |
|---------------|------------|------------|------------|---------------|---------------|---------------|---------------|
| ${}^3LE_1$    | 1.70       | 1          | 1          | 139           | 139           | -148          | -148          |
| ${}^3LE_3$    | 1          | 1.70       | 0          | -151          | 2             | -3            | 142           |
| ${}^3LE_2$    | 1          | 0          | 1.70       | 2             | -151          | 142           | -3            |
| ${}^3CT_{31}$ | 139        | -151       | 2          | 3.00          | -3            | 35            | 2             |
| ${}^3CT_{21}$ | 139        | 2          | -151       | -3            | 3.00          | 2             | 35            |
| ${}^3CT_{12}$ | -148       | -3         | 142        | 35            | 2             | 3.08          | 0             |
| ${}^3CT_{13}$ | -148       | 142        | -3         | 2             | 35            | 0             | 3.08          |

Table S14: Diabatic electronic energies (in eV) and electronic couplings (in meV) obtained through the ER diabatization of the seven lowest excited triplet states of the eclipsed trimer along the vertical distortion (4.2 Å) computed at the (TDA) CAM-B3LYP/6-31G(d) level.  $LE_1 = 1^*23$ ,  $LE_2 = 12^*3$ ,  $LE_3 = 123^*$ ,  $CT_{12} = 1^+2^-3$ ,  $CT_{13} = 1^+23^-$ ,  $CT_{21} = 1^-2^+3$ ,  $CT_{31} = 1^-23^+$ .

| $H_{diab}$    | ${}^3LE_1$ | ${}^3LE_3$ | ${}^3LE_2$ | ${}^3CT_{31}$ | ${}^3CT_{21}$ | ${}^3CT_{12}$ | ${}^3CT_{13}$ |
|---------------|------------|------------|------------|---------------|---------------|---------------|---------------|
| ${}^3LE_1$    | 1.70       | 0          | 0          | 101           | 101           | 109           | 109           |
| ${}^3LE_3$    | 0          | 1.70       | 0          | 1             | -110          | -102          | 1             |
| ${}^3LE_2$    | 0          | 0          | 1.70       | -110          | 1             | 1             | -102          |
| ${}^3CT_{31}$ | 101        | 1          | -110       | 3.06          | -1            | -19           | -1            |
| ${}^3CT_{21}$ | 101        | -110       | 1          | -1            | 3.06          | -1            | -19           |
| ${}^3CT_{12}$ | 109        | -102       | 1          | -19           | -1            | 3.15          | 0             |
| ${}^3CT_{13}$ | 109        | 1          | -102       | -1            | -19           | 0             | 3.15          |

Table S15: Diabatic electronic energies (in eV) and electronic couplings (in meV) obtained through the ER diabatization of the seven lowest excited triplet states of the eclipsed trimer along the vertical distortion (4.8 Å) computed at the (TDA) CAM-B3LYP/6-31G(d) level.  $LE_1 = 1^*23$ ,  $LE_2 = 12^*3$ ,  $LE_3 = 123^*$ ,  $CT_{12} = 1^+2^-3$ ,  $CT_{13} = 1^+23^-$ ,  $CT_{21} = 1^-2^+3$ ,  $CT_{31} = 1^-23^+$ .

| $H_{diab}$    | ${}^3LE_2$ | ${}^3LE_3$ | ${}^3LE_1$ | ${}^3CT_{31}$ | ${}^3CT_{21}$ | ${}^3CT_{12}$ | ${}^3CT_{13}$ |
|---------------|------------|------------|------------|---------------|---------------|---------------|---------------|
| ${}^3LE_2$    | 1.70       | 0          | 0          | 0             | -38           | 34            | 0             |
| ${}^3LE_3$    | 0          | 1.70       | 0          | -38           | 0             | 0             | 34            |
| ${}^3LE_1$    | 0          | 0          | 1.70       | 34            | 34            | -38           | -38           |
| ${}^3CT_{31}$ | 0          | -38        | 34         | 3.21          | 0             | 2             | 0             |
| ${}^3CT_{21}$ | -38        | 0          | 34         | 0             | 3.21          | 0             | 2             |
| ${}^3CT_{12}$ | 34         | 0          | -38        | 2             | 0             | 3.30          | 0             |
| ${}^3CT_{13}$ | 0          | 34         | -38        | 0             | 2             | 0             | 3.30          |

Table S16: Diabatic electronic energies (in eV) and electronic couplings (in meV) obtained through the ER diabatization of the seven lowest excited triplet states of the eclipsed trimer along the vertical distortion (5.3 Å) computed at the (TDA) CAM-B3LYP/6-31G(d) level.  $LE_1 = 1^*23$ ,  $LE_2 = 12^*3$ ,  $LE_3 = 123^*$ ,  $CT_{12} = 1^+2^-3$ ,  $CT_{13} = 1^+23^-$ ,  $CT_{21} = 1^-2^+3$ ,  $CT_{31} = 1^-23^+$ .

| $H_{diab}$    | ${}^3LE_3$ | ${}^3LE_2$ | ${}^3LE_1$ | ${}^3CT_{31}$ | ${}^3CT_{21}$ | ${}^3CT_{12}$ | ${}^3CT_{13}$ |
|---------------|------------|------------|------------|---------------|---------------|---------------|---------------|
| ${}^3LE_3$    | 1.70       | 0          | 0          | -13           | 0             | 0             | -12           |
| ${}^3LE_2$    | 0          | 1.70       | 0          | 0             | -13           | 12            | 0             |
| ${}^3LE_1$    | 0          | 0          | 1.70       | 12            | 12            | -13           | 13            |
| ${}^3CT_{31}$ | -13        | 0          | 12         | 3.30          | 0             | 0             | 0             |
| ${}^3CT_{21}$ | 0          | -13        | 12         | 0             | 3.30          | 0             | 0             |
| ${}^3CT_{12}$ | 0          | 12         | -13        | 0             | 0             | 3.39          | 0             |
| ${}^3CT_{13}$ | -12        | 0          | 13         | 0             | 0             | 0             | 3.39          |

Table S17: Transition energies (in eV), oscillator strengths (in parenthesis), and diabatic contributions  $\omega$  (in %) obtained through the ER diabaticization for the lowest seven excited triplet states of the eclipsed trimer along the vertical distortion computed at the (TDA) CAM-B3LYP/6-31G(d) level.

| state                | $\Delta E$ (f) | $\omega(\text{LE}_1)$ | $\omega(\text{LE}_3)$ | $\omega(\text{LE}_2)$ | $\omega(\text{CT}_{31})$ | $\omega(\text{CT}_{21})$ | $\omega(\text{CT}_{12})$ | $\omega(\text{CT}_{13})$ |
|----------------------|----------------|-----------------------|-----------------------|-----------------------|--------------------------|--------------------------|--------------------------|--------------------------|
| displacement = 3.7 Å |                |                       |                       |                       |                          |                          |                          |                          |
| T <sub>1,+</sub>     | 1.46 (-)       | 57                    | 14                    | 14                    | 5                        | 4                        | 3                        | 3                        |
| T <sub>2,-</sub>     | 1.61 (-)       | 0                     | 47                    | 47                    | 2                        | 2                        | 1                        | 1                        |
| T <sub>3,+</sub>     | 1.70 (-)       | 33                    | 33                    | 34                    | 0                        | 0                        | 0                        | 0                        |
| T <sub>4,+</sub>     | 2.83 (-)       | 0                     | 0                     | 0                     | 31                       | 31                       | 19                       | 19                       |
| T <sub>5,+</sub>     | 2.97 (-)       | 3                     | 1                     | 1                     | 45                       | 45                       | 3                        | 2                        |
| T <sub>6,-</sub>     | 3.07 (-)       | 6                     | 2                     | 2                     | 2                        | 2                        | 43                       | 43                       |
| T <sub>7,-</sub>     | 3.09 (-)       | 0                     | 3                     | 3                     | 17                       | 17                       | 30                       | 30                       |
| displacement = 4.0 Å |                |                       |                       |                       |                          |                          |                          |                          |
| T <sub>1,-</sub>     | 1.61 (-)       | 63                    | 15                    | 15                    | 3                        | 2                        | 1                        | 1                        |
| T <sub>2,-</sub>     | 1.67 (-)       | 0                     | 49                    | 49                    | 1                        | 1                        | 0                        | 0                        |
| T <sub>3,+</sub>     | 1.70 (-)       | 32                    | 34                    | 34                    | 0                        | 0                        | 0                        | 0                        |
| T <sub>4,-</sub>     | 3.00 (-)       | 0                     | 0                     | 0                     | 40                       | 40                       | 10                       | 10                       |
| T <sub>5,+</sub>     | 3.04 (-)       | 2                     | 0                     | 0                     | 49                       | 49                       | 0                        | 0                        |
| T <sub>6,+</sub>     | 3.12 (-)       | 0                     | 1                     | 1                     | 9                        | 9                        | 40                       | 40                       |
| T <sub>7,+</sub>     | 3.13 (-)       | 2                     | 1                     | 1                     | 0                        | 0                        | 48                       | 48                       |
| displacement = 4.2 Å |                |                       |                       |                       |                          |                          |                          |                          |
| T <sub>1,-</sub>     | 1.65 (-)       | 65                    | 16                    | 16                    | 1                        | 1                        | 1                        | 1                        |
| T <sub>2,+</sub>     | 1.69 (-)       | 0                     | 49                    | 49                    | 1                        | 1                        | 0                        | 0                        |
| T <sub>3,+</sub>     | 1.70 (-)       | 32                    | 34                    | 34                    | 0                        | 0                        | 0                        | 0                        |
| T <sub>4,-</sub>     | 3.06 (-)       | 0                     | 0                     | 0                     | 46                       | 46                       | 4                        | 4                        |
| T <sub>5,+</sub>     | 3.08 (-)       | 2                     | 0                     | 0                     | 49                       | 49                       | 0                        | 0                        |
| T <sub>6,+</sub>     | 3.16 (-)       | 0                     | 0                     | 0                     | 4                        | 4                        | 46                       | 46                       |
| T <sub>7,+</sub>     | 3.17 (-)       | 2                     | 0                     | 0                     | 0                        | 0                        | 49                       | 49                       |
| displacement = 4.8 Å |                |                       |                       |                       |                          |                          |                          |                          |
| T <sub>1,-</sub>     | 1.70 (-)       | 17                    | 17                    | 66                    | 0                        | 0                        | 0                        | 0                        |
| T <sub>2,+</sub>     | 1.70 (-)       | 50                    | 50                    | 0                     | 0                        | 0                        | 0                        | 0                        |
| T <sub>3,+</sub>     | 1.70 (-)       | 33                    | 33                    | 34                    | 0                        | 0                        | 0                        | 0                        |
| T <sub>4,-</sub>     | 3.21 (-)       | 0                     | 0                     | 0                     | 50                       | 50                       | 0                        | 0                        |
| T <sub>5,+</sub>     | 3.21 (-)       | 0                     | 0                     | 0                     | 50                       | 50                       | 0                        | 0                        |
| T <sub>6,-</sub>     | 3.30 (-)       | 0                     | 0                     | 0                     | 0                        | 0                        | 50                       | 50                       |
| T <sub>7,-</sub>     | 3.30 (-)       | 0                     | 0                     | 0                     | 0                        | 0                        | 50                       | 50                       |
| displacement = 5.3 Å |                |                       |                       |                       |                          |                          |                          |                          |
| T <sub>1,+</sub>     | 1.70 (-)       | 28                    | 28                    | 44                    | 0                        | 0                        | 0                        | 0                        |
| T <sub>2,-</sub>     | 1.70 (-)       | 0                     | 50                    | 50                    | 0                        | 0                        | 0                        | 0                        |
| T <sub>3,-</sub>     | 1.70 (-)       | 22                    | 22                    | 56                    | 0                        | 0                        | 0                        | 0                        |
| T <sub>4,+</sub>     | 3.30 (-)       | 0                     | 0                     | 0                     | 51                       | 49                       | 0                        | 0                        |
| T <sub>5,-</sub>     | 3.30 (-)       | 0                     | 0                     | 0                     | 49                       | 51                       | 0                        | 0                        |
| T <sub>6,-</sub>     | 3.39 (-)       | 0                     | 0                     | 0                     | 0                        | 0                        | 53                       | 47                       |
| T <sub>7,+</sub>     | 3.30 (-)       | 0                     | 0                     | 0                     | 0                        | 0                        | 47                       | 53                       |

## 6 Optimized geometries

All structures have been optimized at the CAM-B3LYP/6-31G(d) level. Cartesian coordinates given in Angstroms.

### PDI molecule **2**

|   |               |               |               |
|---|---------------|---------------|---------------|
| C | 2.2500844120  | 3.0073935957  | -0.1366396492 |
| C | 0.8864001229  | 2.6633382184  | -0.1099147550 |
| C | 5.1939167598  | -0.1076703044 | -0.0410415235 |
| N | 5.4990643451  | 1.2411997885  | 0.0065804308  |
| C | 4.6429204154  | 2.3274730734  | 0.0507210176  |
| O | -5.1096572692 | -3.4538506983 | 0.1571358448  |
| O | -6.0995782626 | 0.9151471645  | -0.1063267845 |
| C | -4.2244926070 | 2.9277317980  | 0.3414931134  |
| C | -4.2212051168 | 3.9374953329  | -0.6193743245 |
| C | -4.9727619546 | 5.0927543208  | -0.4326913414 |
| C | -5.7177825592 | 5.2582177763  | 0.7269801057  |
| C | -5.7122670751 | 4.2607367101  | 1.6979714176  |
| C | -4.9730379033 | 3.1036647006  | 1.5062432015  |
| C | 2.5448846586  | 4.4613667385  | -0.2894306151 |
| C | 3.1651719371  | 4.9525536879  | -1.4391787079 |
| C | 3.3381974676  | 6.3166227256  | -1.6156853269 |
| C | 2.8975327245  | 7.2108712122  | -0.6440122766 |
| C | 2.2758313845  | 6.7308740984  | 0.5006884294  |
| C | 2.0909747913  | 5.3630118731  | 0.6717983501  |
| O | 6.0892576786  | -0.9201276595 | -0.1517748830 |
| O | 5.1012441178  | 3.4456344031  | 0.1676629897  |
| C | 4.2172654242  | -2.9369258427 | 0.2856641168  |
| C | 4.9697264742  | -3.1247854420 | 1.4460248643  |
| C | 5.7110067426  | -4.2829243392 | 1.6226504124  |
| C | 5.7145690134  | -5.2695889891 | 0.6406849765  |
| C | 4.9656151941  | -5.0922458503 | -0.5147130995 |
| C | 4.2120855163  | -3.9359154741 | -0.6863496649 |
| H | -1.6704953963 | 3.0602189751  | 0.2138003259  |
| H | 0.1814127635  | 3.4810514695  | -0.1805494000 |
| H | 1.6621928169  | -3.0687341800 | 0.1692396592  |
| H | -0.1918893967 | -3.4850685252 | -0.2189584245 |
| H | -3.6388012753 | 3.8114195645  | -1.5275846503 |
| H | -4.9712212989 | 5.8645955680  | -1.1962493333 |
| H | -6.3006122076 | 6.1617404830  | 0.8771111396  |
| H | -6.2891082718 | 4.3850061300  | 2.6092371004  |
| H | -4.9762688940 | 2.3257996578  | 2.2632953313  |
| H | 3.5154421300  | 4.2581630933  | -2.1961970205 |
| H | 3.8213575506  | 6.6849750572  | -2.5153180636 |

|   |               |               |               |
|---|---------------|---------------|---------------|
| H | 3.0383569943  | 8.2784094775  | -0.7819784760 |
| H | 1.9295734786  | 7.4201051396  | 1.2647043912  |
| H | 1.6036881101  | 4.9904102865  | 1.5682639791  |
| H | 4.9744356201  | -2.3552757975 | 2.2115799726  |
| H | 6.2909188646  | -4.4165187273 | 2.5306472067  |
| H | 6.2989517414  | -6.1740014477 | 0.7789178401  |
| H | 4.9625644086  | -5.8556534878 | -1.2867022722 |
| H | 3.6267344977  | -3.8004958010 | -1.5913241929 |
| H | -3.5338050373 | -4.2412803376 | -2.2254804272 |
| H | -3.8422957891 | -6.6646683147 | -2.5677429820 |
| H | -3.0535449230 | -8.2757951043 | -0.8535441939 |
| H | -1.9362714572 | -7.4387609709 | 1.1973089619  |
| H | -1.6078199731 | -5.0123252029 | 1.5239606484  |
| H | 6.4877709651  | 1.4650424652  | 0.0107641076  |
| H | -6.4970428007 | -1.4716898623 | 0.0297942451  |



PDI molecule **3**

|   |               |               |               |
|---|---------------|---------------|---------------|
| C | 5.0378970427  | 1.2468551529  | -0.0000122959 |
| C | 3.5572725656  | 1.2267014025  | -0.0000074344 |
| C | 2.8516702977  | 0.0000003636  | 0.0000075899  |
| C | 3.5572726968  | -1.2267005309 | 0.0000223629  |
| C | 5.0378970628  | -1.2468541204 | 0.0000215127  |
| N | 5.6475935571  | 0.0000005843  | 0.0000049538  |
| C | 1.4319783136  | 0.0000002820  | 0.0000090179  |
| C | 0.7366929282  | 1.2466859520  | 0.0000033601  |
| C | 1.4709798844  | 2.4207893405  | -0.0000135312 |
| C | 2.8692019906  | 2.4148265741  | -0.0000194855 |
| C | 2.8692022412  | -2.4148258261 | 0.0000389433  |
| C | 1.4709801884  | -2.4207887960 | 0.0000361434  |
| C | 0.7366930725  | -1.2466854299 | 0.0000172375  |
| C | -0.7366922701 | -1.2466854876 | 0.0000043289  |
| C | -1.4319776023 | 0.0000002240  | 0.0000092808  |
| C | -0.7366923713 | 1.2466858510  | 0.0000160586  |
| C | -2.8516695898 | 0.0000002103  | 0.0000077347  |
| C | -3.5572719463 | -1.2267007988 | -0.0000061700 |
| C | -2.8692014368 | -2.4148259764 | -0.0000177935 |
| C | -1.4709793005 | -2.4207888580 | -0.0000120778 |
| C | -3.5572719344 | 1.2267011365  | 0.0000214012  |
| C | -2.8692014201 | 2.4148264108  | 0.0000363800  |
| C | -1.4709793654 | 2.4207892974  | 0.0000332715  |
| C | -5.0378964137 | -1.2468544308 | -0.0000109389 |
| N | -5.6475928618 | 0.0000001366  | 0.0000046776  |
| C | -5.0378962762 | 1.2468548045  | 0.0000208847  |
| O | -5.7000896459 | -2.2650320512 | -0.0000262448 |
| O | -5.7000896494 | 2.2650323213  | 0.0000334829  |
| O | 5.7000904914  | -2.2650315932 | 0.0000334879  |
| O | 5.7000902304  | 2.2650327834  | -0.0000286973 |
| H | -0.9708023710 | -3.3805124399 | -0.0000220468 |
| H | 0.9708032845  | -3.3805123949 | 0.0000502046  |
| H | 6.6615247306  | 0.0000004449  | 0.0000017323  |
| H | -6.6615240516 | 0.0000003411  | 0.0000020706  |
| H | 3.4308051272  | -3.3424426187 | 0.0000531819  |
| H | -3.4308041491 | -3.3424428796 | -0.0000310364 |
| H | -0.9708023219 | 3.3805128275  | 0.0000457419  |
| H | -3.4308041153 | 3.3424433197  | 0.0000494130  |
| H | 0.9708028291  | 3.3805128890  | -0.0000236412 |
| H | 3.4308046435  | 3.3424435113  | -0.0000330618 |
